# Supplementary material for: Microsatellite standardization and evaluation of genotyping error in a large multi-partner research programme for conservation of Atlantic salmon (Salmo salar L.)
Source: PubMed Central journal article supplement — Genetica. 2011 Feb 1;139(3):353–67. doi: 10.1007/s10709-011-9554-4 (PMC3059809; doi:10.1007/s10709-011-9554-4), 2011-02-01
Supplement: 10709_2011_9554_MOESM1_ESM.pdf [file 10709_2011_9554_MOESM1_ESM.pdf]

**Title:**

Microsatellite standardization and genotyping error in a large multi-partner research programme for conservation of Atlantic salmon (*Salmo salar* L.)

**Journal:**

Genetica

**Authors:**

Ellis JS<sup>1</sup>, Gilbey J<sup>2</sup>, Armstrong A<sup>2</sup>, Balstad T<sup>10</sup>, Cauwelier C<sup>2</sup>, Cherbonnel C<sup>3</sup>,  
Consuegra S<sup>4</sup>, Coughlan J<sup>5</sup>, Cross TF<sup>5</sup>, Crozier W<sup>6</sup>, Dillane E<sup>5</sup>, Ensing D<sup>6</sup>,  
García de Leániz C<sup>7</sup>, García- Vázquez E<sup>8</sup>, Griffiths AM<sup>9</sup>, Hindar K<sup>10</sup>, Hjorleifsdottir S<sup>11</sup>, Knox D<sup>2</sup>,  
Machado-Schiaffino G<sup>8</sup>, McGinnity P<sup>5</sup>, Meldrup D<sup>12</sup>, Nielsen EE<sup>12</sup>, Olafsson K<sup>11</sup>,  
Primmer CR<sup>13</sup>, Prodohl P<sup>16</sup>, Stradmeyer L<sup>2</sup>, Vähä J-P<sup>13</sup>, Verspoor E<sup>2</sup>, Wennevik V<sup>15</sup> and Stevens J R<sup>1</sup>

<sup>1</sup>School of Biosciences, Hatherly Laboratories, University of Exeter, Prince of Wales Rd, Exeter, EX4 4PS, UK.

<sup>2</sup>Marine Scotland, Freshwater Laboratory, Faskally, Pitlochry, Scotland, PH16 4LB, UK.

<sup>3</sup>GENINDEXE, 6 rue des Sports, 17000 La Rochelle, France

<sup>4</sup>Institute of Biological, Environmental & Rural Sciences Aberystwyth University, Edward Llwyd Building Penglais Campus, Ceredigion, SY23 3DA, UK

<sup>5</sup>Department of Zoology, Ecology & Plant Science/Aquaculture & Fisheries Development Centre, University College, Cork, Ireland

<sup>6</sup>Agri-Food and Biosciences Institute Northern Ireland, Fisheries and Aquatic Ecosystems Branch, Newforge Lane, Belfast, Northern Ireland, BT9 5PX

<sup>7</sup>School of the Environment and Society, Swansea University, Swansea, Wales.

<sup>8</sup>Departament of Functional Biology, Genetics, Universidad of Oviedo, C/ Julian Claveria s/n, 33006 Oviedo, Spain

<sup>9</sup>Marine Biological Association of the UK, The Laboratory, Citadel Hill, Plymouth PL1 2PB, UK

<sup>10</sup>Norwegian Institute for Nature Research (NINA), N-7485 Trondheim, Norway

<sup>11</sup>Matis ohf., Vinlandsleid 12, 113 Reykjavik, Iceland.

<sup>12</sup>DTU Aqua, National Institute of Aquatic Resources, Technical University of Denmark, Vejlsøve 39, 8600 Silkeborg

<sup>13</sup>DTU Aqua, National Institute of Aquatic Resources, Technical University of Denmark, Vejlsøve 39, 8600 Silkeborg

<sup>14</sup>Department of Biology, University of Turku, FIN-20014, Finland

<sup>15</sup>Institute of Marine Research, Nordnesgaten 50, 5005 Bergen, Norway

Corresponding author: J. R. Stevens, email: J.R.Stevens@exeter.ac.uk, tel: 01392 263775

**Supplementary data** Allelic error rates for each locus and laboratory, including number of alleles at each locus

(observed by baseline laboratory for control plate samples), locus size range and repeat type. A: before calibration, B: after calibration

| <b>Allelic error</b>  |              |               |               |               |               |                |                |                |               |                 |                 |                 |                 |                 |               |               |
|-----------------------|--------------|---------------|---------------|---------------|---------------|----------------|----------------|----------------|---------------|-----------------|-----------------|-----------------|-----------------|-----------------|---------------|---------------|
|                       | <b>Ssa14</b> | <b>Ssa171</b> | <b>Ssa197</b> | <b>Ssa202</b> | <b>Ssa289</b> | <b>SsaD144</b> | <b>SsaD157</b> | <b>SsaD486</b> | <b>SsaF43</b> | <b>SSsp1605</b> | <b>SSsp2201</b> | <b>SSsp2210</b> | <b>SSsp2216</b> | <b>SSsp3016</b> | <b>SSspG7</b> | <b>Ssol85</b> |
| <b>Size range</b>     | 24           | 84            | 160           | 184           | 42            | 188            | 204            | 64             | 54            | 102             | 180             | 84              | 124             | 96              | 132           | 64            |
| <b>No. of alleles</b> | 5            | 30            | 28            | 23            | 6             | 36             | 32             | 12             | 10            | 10              | 35              | 14              | 21              | 18              | 28            | 20            |
| <b>Repeat type</b>    | di           | di            | tetra         | tetra         | di            | tetra          | tetra          | tetra          | di            | tetra           | tetra           | tetra           | tetra           | tetra           | tetra         | di            |
| <b>A</b>              |              |               |               |               |               |                |                |                |               |                 |                 |                 |                 |                 |               |               |
| A                     |              | 0.0000        | 0.0100        | 0.0000        |               | 0.0000         | 0.0035         | 0.0068         |               | 0.0000          | 0.0000          | 0.0000          | 0.0000          | 0.0000          |               | 0.0000        |
| B                     | 0.0029       | 0.0115        | 0.0000        | 0.0000        | 0.0029        | 0.0029         | 0.0199         | 0.0000         | 0.1552        | 0.0261          | 0.0208          | 0.0000          | 0.0057          | 0.0145          | 0.0259        |               |
| C                     | 0.0056       | 0.0028        | 0.0141        | 0.0063        | 0.0000        |                | 0.0032         | 0.0057         | 0.0552        | 0.0158          | 0.0131          | 0.0090          | 0.0061          | 0.0114          | 0.0150        | 0.0056        |
| D                     | 0.0000       | 0.0029        | 0.0174        | 0.0000        | 0.0029        | 0.0086         | 0.0000         | 0.0000         | 0.0257        | 0.0219          | 0.0000          | 0.0029          | 0.0172          | 0.0058          | 0.0000        |               |
| E                     |              |               | 0.0058        | 0.0114        |               |                |                |                |               | 0.0368          |                 | 0.0143          |                 |                 | 0.7184        |               |
| F                     |              | 0.0000        |               |               | 0.0030        | 0.0099         | 0.0097         |                |               |                 | 0.0066          |                 |                 |                 |               | 0.0065        |
| G                     | 0.0057       | 0.0029        | 0.0028        | 0.0000        | 0.0029        | 0.0000         | 0.0029         | 0.0000         | 0.0058        | 0.0000          | 0.0057          | 0.0028          | 0.0000          | 0.0000          | 0.0057        |               |
| H                     | 0.0000       | 0.0028        | 0.0000        | 0.0116        | 0.0000        | 0.0118         | 0.0234         | 0.0000         | 0.0056        | 0.0037          | 0.0208          | 0.0227          | 0.0000          | 0.0028          | 0.0144        | 0.0057        |
| I                     | 0.0062       | 0.0194        | 0.0034        | 0.0149        | 0.0111        | 0.3294         | 0.0361         |                | 0.0559        | 0.0150          | 0.0663          | 0.0087          | 0.0093          | 0.0243          | 0.6441        | 0.1169        |
| J                     | 0.0540       | 0.0824        | 0.0763        | 0.0000        | 0.1051        | 0.0085         | 0.0116         |                | 0.0819        | 0.0000          | 0.0086          | 0.0028          | 0.0621          | 0.0795          | 0.0114        | 0.0876        |
| K                     | 0.0142       | 0.0143        | 0.0959        | 0.0115        | 0.0114        | 0.4109         | 0.5057         | 0.0057         | 0.0175        | 0.0481          | 0.1444          | 0.4080          | 0.1424          |                 | 0.7632        | 0.0374        |
| L                     | 0.0057       | 0.0200        | 0.0320        | 0.0029        | 0.0000        | 0.1358         | 0.0118         |                | 0.0171        | 0.0036          | 0.0089          | 0.4118          | 0.0000          | 0.0057          | 0.6571        | 0.0374        |
| <b>B</b>              |              |               |               |               |               |                |                |                |               |                 |                 |                 |                 |                 |               |               |
| A                     |              | 0.0000        | 0.0100        | 0.0000        |               | 0.0000         | 0.0035         | 0.0068         |               | 0.0000          | 0.0000          | 0.0000          | 0.0000          | 0.0000          |               | 0.0000        |
| B                     | 0.0029       | 0.0115        | 0.0000        | 0.0000        | 0.0029        | 0.0029         | 0.0199         | 0.0000         | 0.0316        | 0.0261          | 0.0208          | 0.0000          | 0.0057          | 0.0145          | 0.0259        |               |
| C                     | 0.0056       | 0.0028        | 0.0141        | 0.0063        | 0.0000        |                | 0.0032         | 0.0057         | 0.0552        | 0.0158          | 0.0131          | 0.0090          | 0.0061          | 0.0114          | 0.0150        | 0.0056        |
| D                     | 0.0000       | 0.0029        | 0.0174        | 0.0000        | 0.0029        | 0.0086         | 0.0000         | 0.0000         | 0.0257        | 0.0219          | 0.0000          | 0.0029          | 0.0000          | 0.0058          | 0.0000        |               |
| E                     |              |               | 0.0058        | 0.0114        |               |                |                |                |               | 0.0368          |                 | 0.0143          |                 |                 | 0.0086        |               |
| F                     |              | 0.0000        |               |               | 0.0030        | 0.0099         | 0.0097         |                |               |                 | 0.0066          |                 |                 |                 |               | 0.0065        |
| G                     | 0.0057       | 0.0029        | 0.0028        | 0.0000        | 0.0029        | 0.0000         | 0.0029         | 0.0000         | 0.0058        | 0.0000          | 0.0057          | 0.0028          | 0.0000          | 0.0000          | 0.0057        |               |
| H                     | 0.0000       | 0.0028        | 0.0000        | 0.0116        | 0.0000        | 0.0118         | 0.0234         | 0.0000         | 0.0056        | 0.0037          | 0.0208          | 0.0227          | 0.0000          | 0.0028          | 0.0144        | 0.0057        |
| I                     | 0.0000       | 0.0191        | 0.0034        | 0.0375        | 0.0000        | 0.0320         | 0.0361         |                | 0.0510        | 0.0000          | 0.0259          | 0.0000          | 0.0094          | 0.0000          | 0.0172        | 0.0974        |
| J                     | 0.0540       | 0.0625        | 0.0763        | 0.0000        | 0.1051        | 0.0085         | 0.0116         |                | 0.0819        | 0.0000          | 0.0086          | 0.0028          | 0.0621          | 0.0795          | 0.0114        | 0.0621        |
| K                     | 0.0057       | 0.0086        | 0.0145        | 0.0115        | 0.0113        | 0.0471         | 0.0114         | 0.0029         | 0.0205        | 0.0410          | 0.0706          | 0.0000          | 0.0203          |                 | 0.0116        | 0.1337        |
| L                     | 0.0057       | 0.0171        | 0.0320        | 0.0029        | 0.0000        | 0.0086         | 0.0118         |                | 0.0171        | 0.0036          | 0.0089          | 0.0029          | 0.0000          | 0.0057          | 0.0171        | 0.0029        |
